# Supplementary material
Source: publisher site journal article supplement (https://www.dovepress.com/get_supplementary_file.php?f=272319.docx)
Supplement: Supplementary file 1 [file get_supplementary_file.php]

Supplementary Information

**Efficacy of combination therapy with linalool and doxorubicin encapsulated by liposomes as a two-in-one hybrid carrier system for epithelial ovarian carcinoma**

Tae In Wi1,4, Ji Eun Won1,4, Chan Mi Lee1, Jeong-Won Lee2, Tae Heung Kang1, Byung Cheol Shin3, Hee Dong Han1,*, and Yeong-Min Park1,**

**Corresponding Authors:**

*Hee Dong Han, Department of Immunology, School of Medicine, Konkuk University, 268 Chungwondae-Ro, Chungju, Chungcheongbuk-Do 380-701, South Korea, Phone: 82-2-2030-7848, Fax: 82-2-2049-6192, E-mail: [hanhd@kku.ac.kr](mailto:hanhd@kku.ac.kr)

**Yeong-Min Park, Department of Immunology, School of Medicine, Konkuk University, 268 Chungwondae-Ro, Chungju, Chungcheongbuk-Do 380-701, South Korea, Phone: 82-2-2049-6330, Fax: 82-2-2049-6192, E-mail: [immun3023@kku.ac.kr](mailto:immun3023@kku.ac.kr)


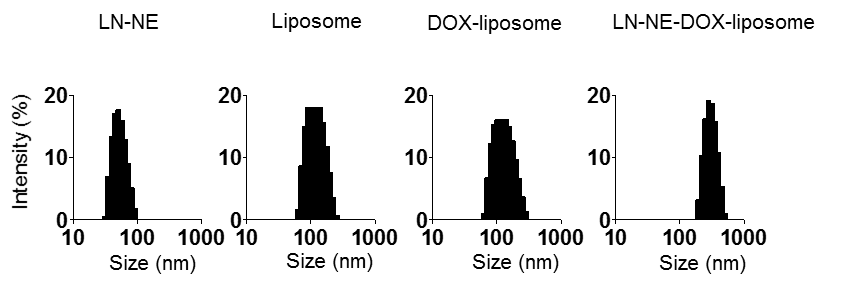


**Supplementary Figure S1.** The size distribution of liposomal formulations.

**
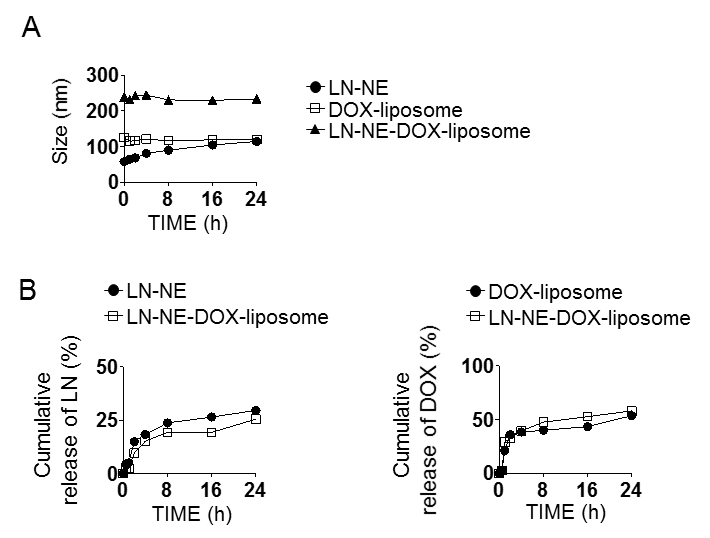
**

**Supplementary Figure S2.** Stability and drug release. (A) Size change of liposomes in 10% FBS. (B) Release of DOX or LN from liposomes in PBS was measured by UV-vis spectrophotometry (LN; 295 nm and DOX; 490 nm). The data are presented as the mean ± S.D. (n = 3).
